# Supplementary material for: Tumor genomic, transcriptomic, and immune profiling characterizes differential response to first‐line platinum chemotherapy in high grade serous ovarian cancer
Source: PubMed Central journal article supplement (PMC8085970; doi:10.1002/cam4.3831), 2021-04-03
Supplement: CAM4-10-3045-s004.pdf [file CAM4-10-3045-s004.pdf]

**A**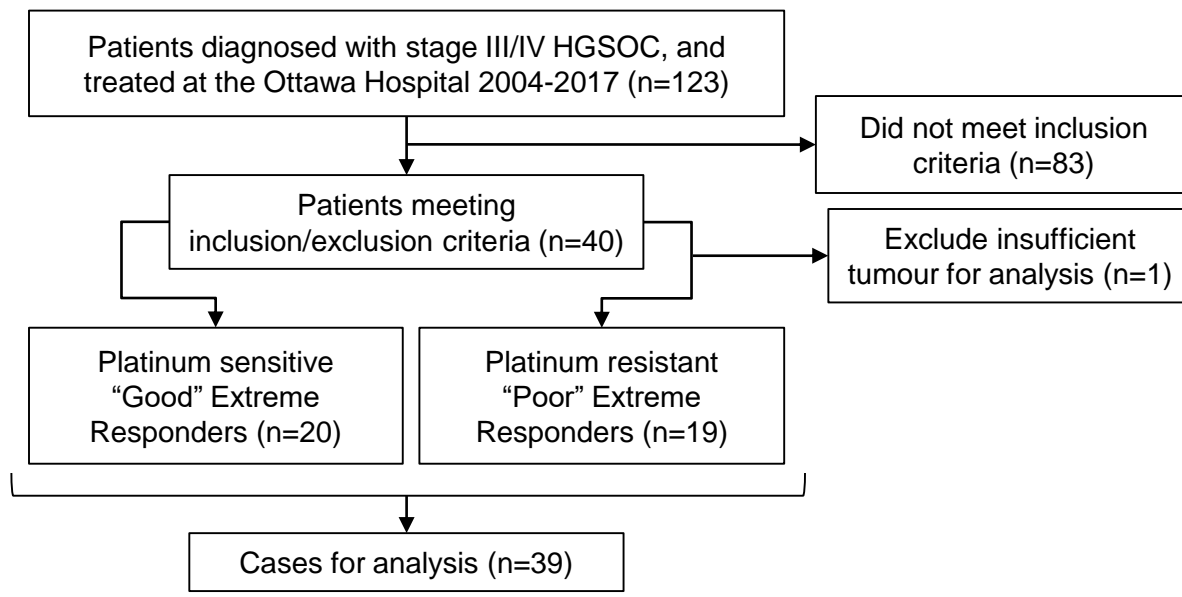**B**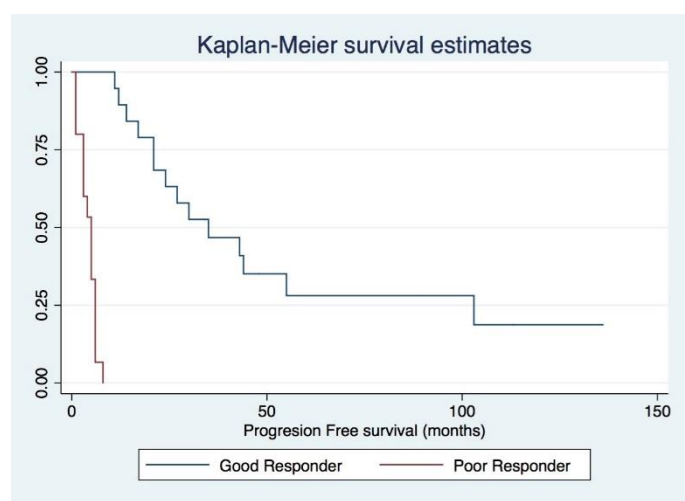**C**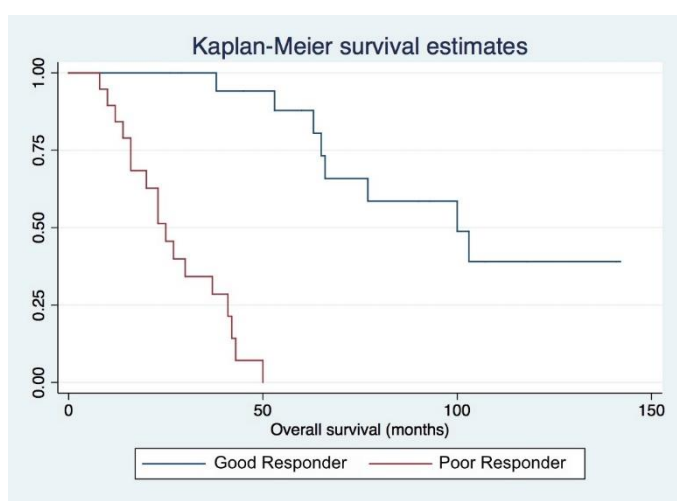**Supplemental Figure 1**

**A**

- NER
- CELL CYCLE/ CHECKPOINT
- HOMOLOGOUS RECOMBINATION
- REPLICATION
- BER
- FANCONI ANEMIA
- CHROMATIN
- MMR
- NHEJ/ CSR
- APOPTOSIS

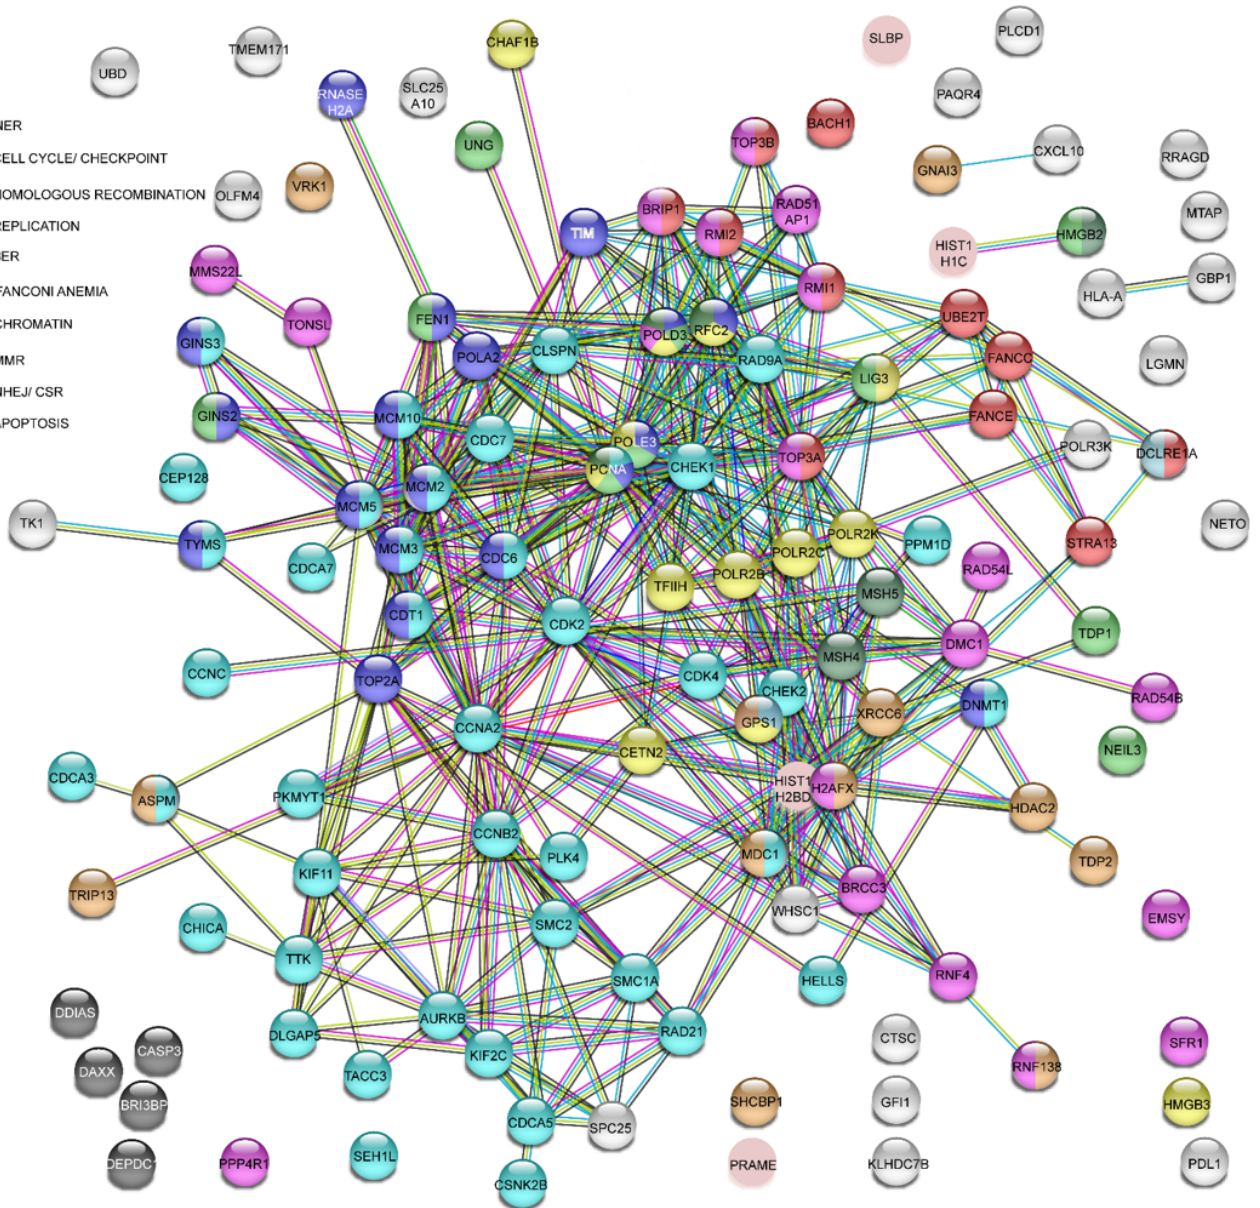

| Pathway ID | Type | Description                      | False discovery rate |
|------------|------|----------------------------------|----------------------|
| hsa04110   | KEGG | cell cycle                       | 4.15E-15             |
| hsa03030   | KEGG | DNA replication                  | 1.96E-11             |
| hsa03460   | KEGG | Fanconi Anemia (FA)              | 7.30E-09             |
| hsa03410   | KEGG | Base excision repair (BER)       | 2.07E-07             |
| hsa03420   | KEGG | Nucleotide excision repair (NER) | 1.72E-05             |
| hsa3440    | KEGG | Homologous recombination (HR)    | 2.40E-04             |
| hsa03430   | KEGG | Mismatch repair (MMR)            | 5.20E-03             |
| hsa03450   | KEGG | NHEJ                             | 3.08E-02             |

**C**

| Pathway ID | Type | Description                      | False discovery rate |
|------------|------|----------------------------------|----------------------|
| hsa03420   | KEGG | Nucleotide excision repair (NER) | 1.69E-05             |
| hsa03410   | KEGG | Base excision repair (BER)       | 2.10E-04             |
| hsa03030   | KEGG | DNA replication                  | 2.10E-04             |
| hsa03020   | KEGG | RNA polymerase                   | 2.10E-04             |
| hsa3440    | KEGG | Homologous recombination (HR)    | 2.40E-04             |
| hsa03430   | KEGG | Mismatch repair (MMR)            | 4.10E-03             |

**B**

| Pathway ID | Type                    | Description                       | False discovery rate |
|------------|-------------------------|-----------------------------------|----------------------|
| GO:0045786 | Biological process (GO) | Negative regulation of cell cycle | 9.43E-05             |
| hsa05200   | KEGG                    | Pathways in cancer                | 4.60E-04             |
| hsa03420   | KEGG                    | Nucleotide excision repair (NER)  | 3.40E-03             |

| Pathway ID | Type | Description                      | False discovery rate |
|------------|------|----------------------------------|----------------------|
| hsa03420   | KEGG | Nucleotide excision repair (NER) | 1.40E-04             |
| hsa03410   | KEGG | Base excision repair (BER)       | 1.00E-03             |
| hsa03030   | KEGG | DNA replication                  | 1.00E-03             |
| hsa03020   | KEGG | RNA polymerase                   | 1.00E-03             |
| hsa3440    | KEGG | Homologous recombination (HR)    | 1.10E-03             |
| hsa04110   | KEGG | Cell cycle                       | 1.30E-03             |
| hsa03460   | KEGG | Fanconi Anemia pathway (FA)      | 1.70E-03             |
| hsa03430   | KEGG | Mismatch repair (MMR)            | 9.40E-03             |

**Supplemental Figure 2**

A

### ATR CNV vs z-score (n=29)

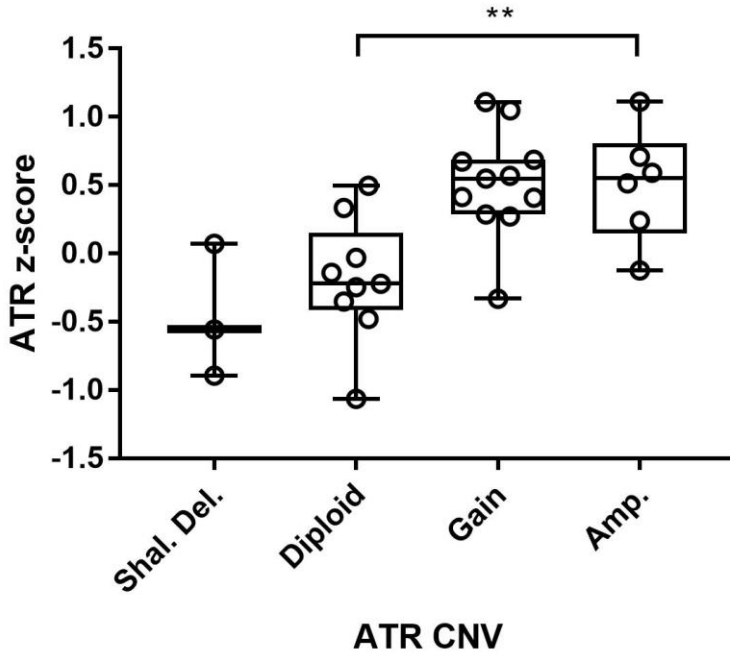

P= 0.0076  
Two-tailed Mann-Whitney

B

### Correlation of ATR expression with its amplification

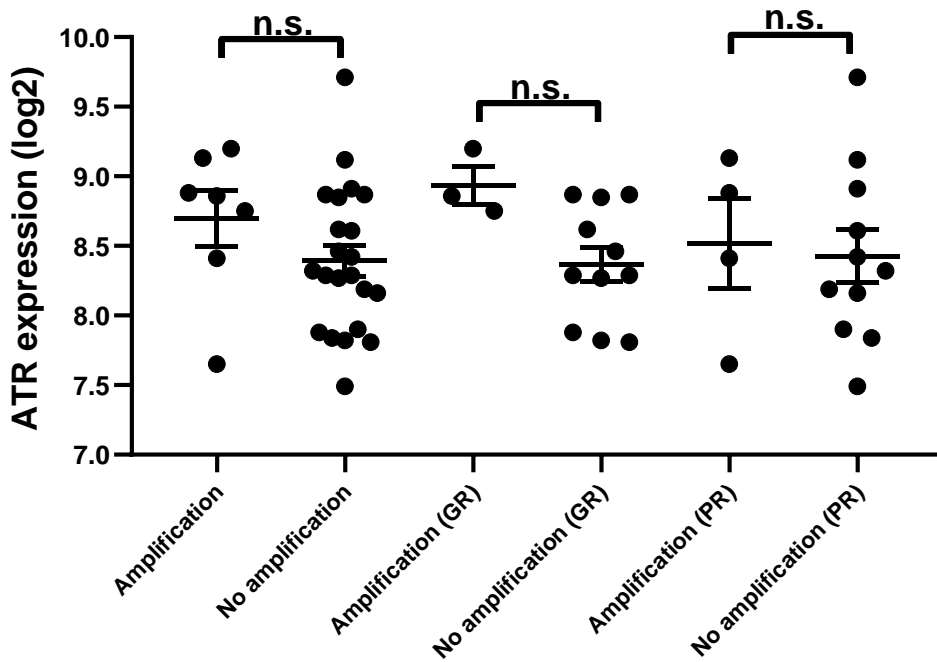

Total -> p = 0.1318

GR group -> p = 0.797

PR group -> p = 0.7531

A

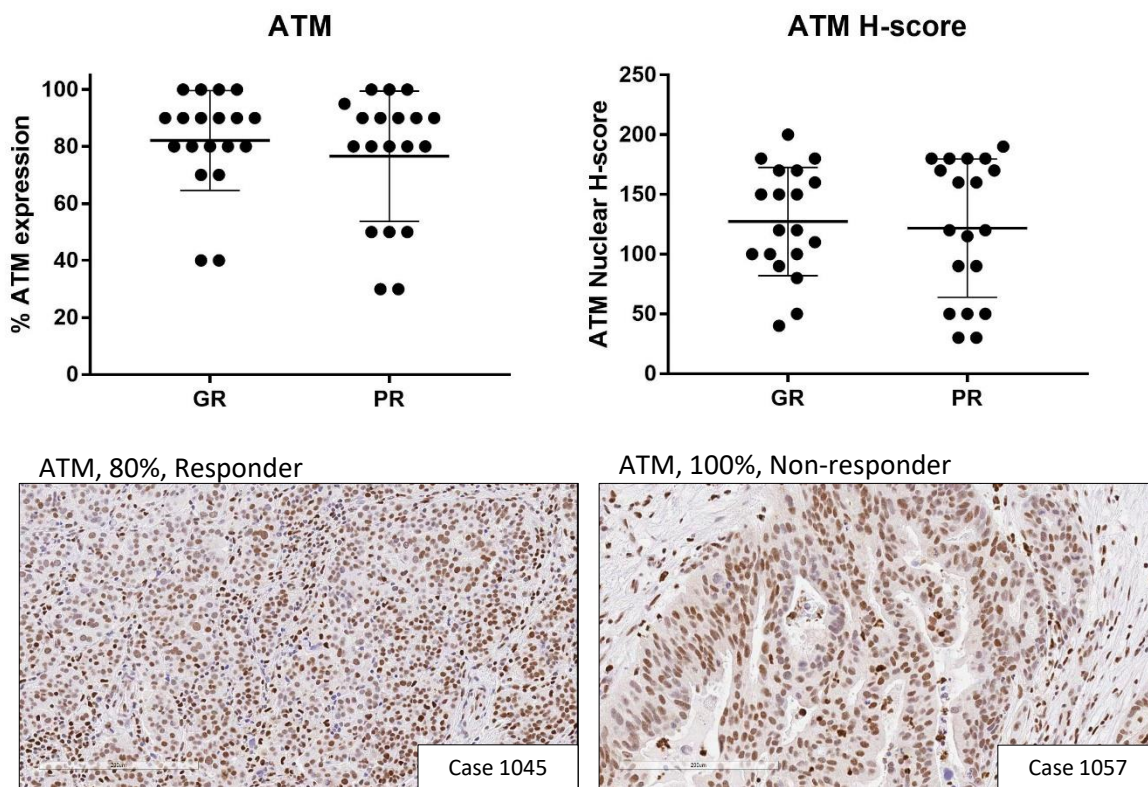

B

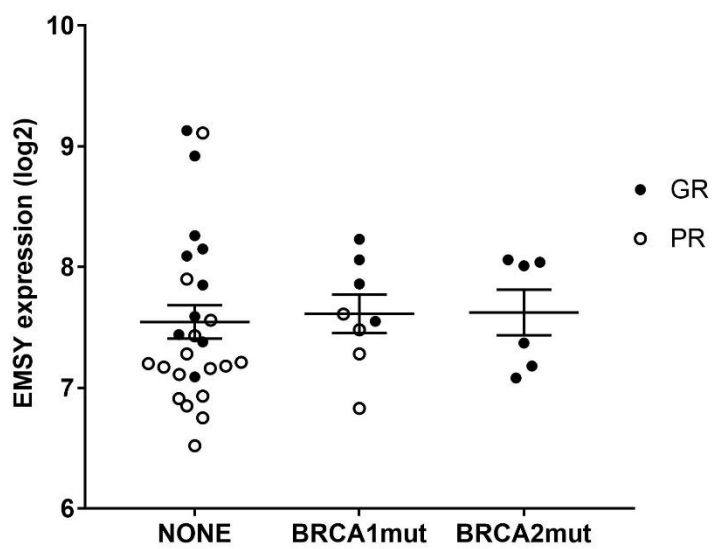

Supplemental Figure 4

**A**

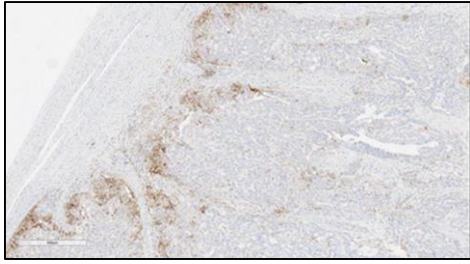

**B**

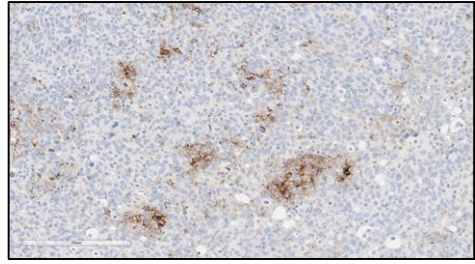

**Supplemental Figure 5**

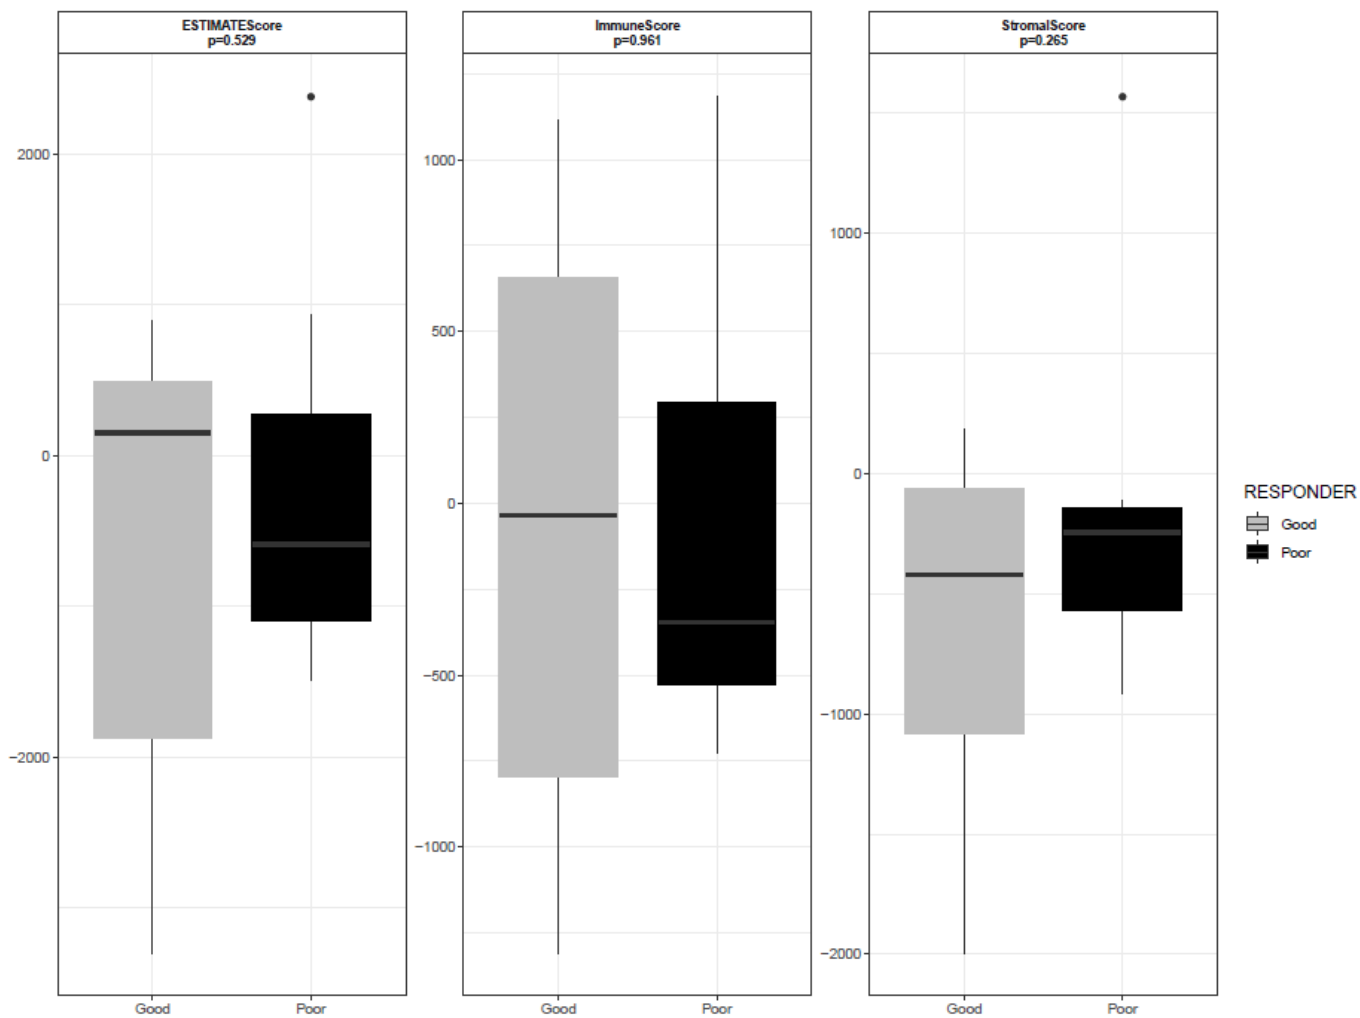

Supplemental Figure 6

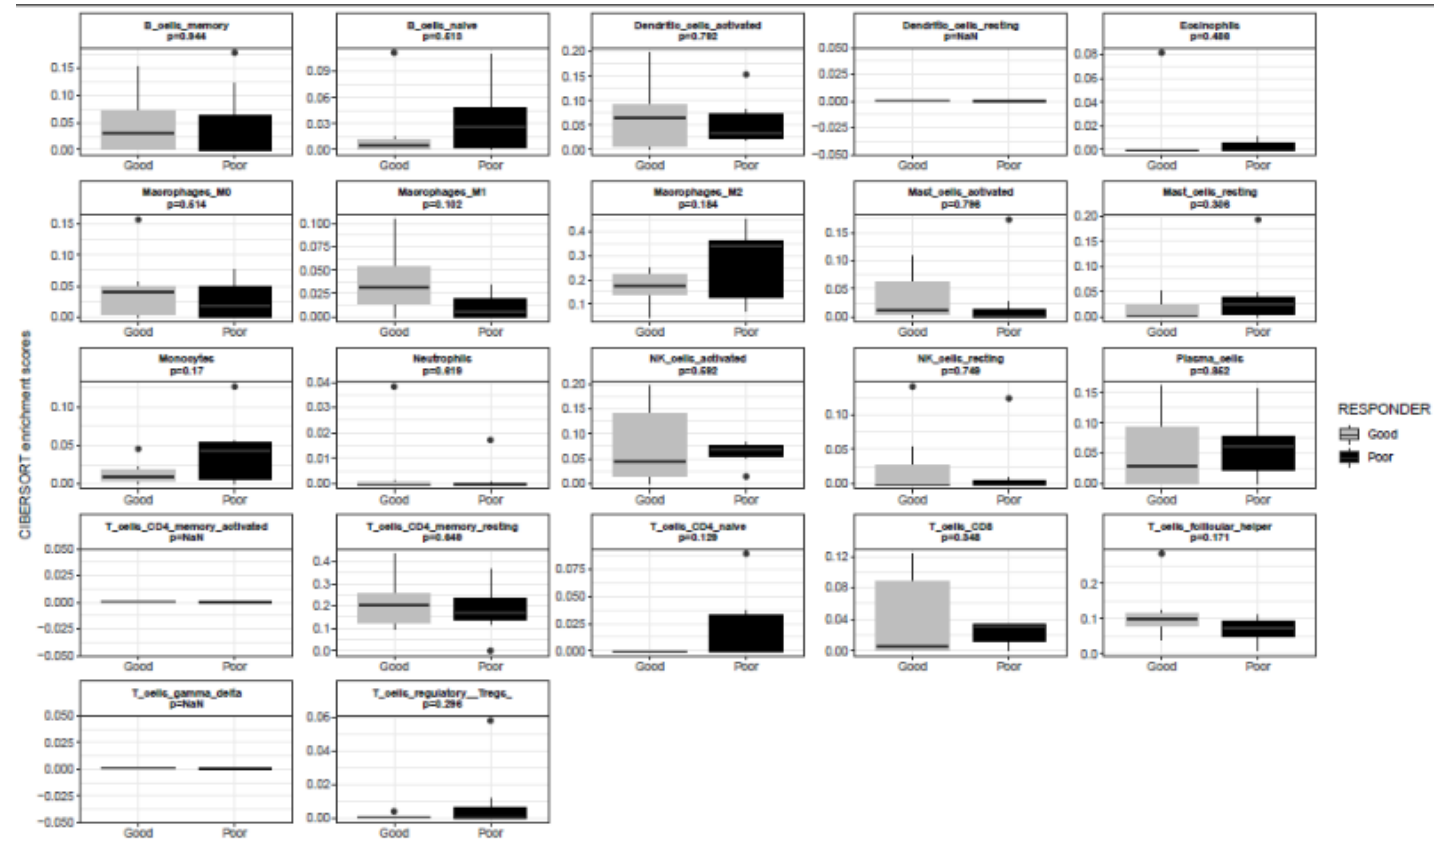

Supplemental Figure 7
